# Supplementary material for: Dietary Intake and Status of Vitamin B12 in Slovenian Population
Source: MDPI journal article supplement (doi:10.3390/nu14020334), 2022-01-13
Supplement: s1 [file s1]

**Supplementary Table S1.** Mean (SD) and model-adjusted mean (95% CI) levels of usual daily intake of vitamin B12 by sex, residential area, education, financial status, employment, vegetarian/vegan diet, smoking status, dietary restrictions, BMI, and IPAQ score for different age cohorts.

| Variable             | Level              | Adolescents (10–17 Years Old) |           |               | Adults (18–64 Years Old) |           |               | Elderly (65–74 Years Old) |            |               |
|----------------------|--------------------|-------------------------------|-----------|---------------|--------------------------|-----------|---------------|---------------------------|------------|---------------|
|                      |                    | N                             | Mean      | Adjusted mean | N                        | Mean      | Adjusted mean | N                         | Mean       | Adjusted mean |
| Overall N (%)        |                    | 468                           | 5.4 (4.4) |               | 364                      | 6.1 (4.6) |               | 416                       | 5.4 (6.1)  |               |
| Sex                  | male               | 238                           | 6.0 (4.8) | 6.0 (5.4–6.6) | 173                      | 6.8 (4.8) | 7.0 (6.2–7.8) | 213                       | 6.1 (7.6)  | 5.9 (5.0–6.9) |
|                      | female             | 230                           | 4.8 (3.9) | 4.8 (4.3–5.4) | 191                      | 5.5 (4.4) | 5.5 (4.8–6.3) | 203                       | 4.6 (3.8)  | 4.9 (3.9–5.8) |
| Residential area     | rural              | 270                           | 5.3 (4.2) | 5.3 (4.8–5.9) | 202                      | 6.0 (3.9) | 6.0 (5.3–6.7) | 229                       | 5.7 (7.1)  | 5.7 (3.9–5.5) |
|                      | intermediate       | 76                            | 5.1 (2.4) | 5.2 (4.2–6.2) | 56                       | 5.4 (3.0) | 5.5 (4.2–6.9) | 71                        | 4.8 (4.7)  | 5.0 (3.5–6.6) |
|                      | urban              | 122                           | 5.8 (5.6) | 5.8 (5.0–6.6) | 106                      | 6.8 (6.3) | 6.9 (6.0–7.9) | 116                       | 5.0 (4.4)  | 5.0 (3.8–6.2) |
| Education            | no university      | n.a.                          | n.a.      | n.a.          | 249                      | 5.9 (3.8) | 6.0 (5.3–6.7) | 342                       | 5.4 (6.4)  | 5.4 (4.7–6.1) |
|                      | university degree  |                               |           |               | 115                      | 6.7 (6.1) | 6.7 (5.7–7.8) | 74                        | 5.4 (4.4)  | 5.4 (3.8–7.0) |
| Financial status     | below average      | n.a.                          | n.a.      | n.a.          | 118                      | 6.4 (5.6) | 6.8 (5.8–7.7) | 269                       | 5.2 (6.4)  | 5.2 (4.4–5.9) |
|                      | above average      |                               |           |               | 189                      | 6.1 (4.4) | 5.9 (5.2–6.6) | 107                       | 5.9 (5.7)  | 6.0 (4.7–7.2) |
| Employment           | employed           | n.a.                          | n.a.      | n.a.          | 226                      | 6.4 (5.2) | 6.6 (5.9–7.4) | n.a.                      | n.a.       | n.a.          |
|                      | unemployed         |                               |           |               | 42                       | 5.5 (3.9) | 5.6 (3.9–7.2) |                           |            |               |
|                      | student            |                               |           |               | 32                       | 6.2 (2.8) | 6.2 (4.1–8.3) |                           |            |               |
|                      | retired            |                               |           |               | 64                       | 5.3 (3.5) | 5.2 (3.9–6.6) |                           |            |               |
| Smoking status       | current, ex-smoker | 30                            | 5.5 (3.1) | 5.3 (3.7–6.9) | 165                      | 6.2 (5.0) | 6.4 (6.0–7.2) | 185                       | 5.9 (5.8)  | 5.6 (4.6–6.6) |
|                      | non smoker         | 438                           | 5.4 (4.5) | 5.4 (5.0–5.9) | 199                      | 6.0 (4.4) | 6.1 (5.3–6.8) | 231                       | 5.0 (6.3)  | 5.2 (4.3–6.1) |
| BMI                  | normal             | 301                           | 5.5 (4.3) | 5.5 (5.0–6.0) | 148                      | 6.3 (5.1) | 6.6 (5.7–7.4) | 108                       | 4.9 (4.2)  | 5.3 (4.0–6.6) |
|                      | overweight and     | 167                           | 5.3 (4.7) | 5.3 (4.6–5.9) | 216                      | 6.0 (4.3) | 6.0 (5.3–6.7) | 308                       | 5.5 (6.6)  | 5.4 (4.7–6.2) |
| IPAQ                 | low intensity      | 108                           | 5.6 (3.0) | 5.6 (4.7–6.4) | 127                      | 6.1 (4.5) | 6.4 (5.5–7.3) | 137                       | 5.6 (5.5)  | 5.6 (4.5–6.7) |
|                      | moderate           | 141                           | 5.6 (6.8) | 5.7 (4.9–6.4) | 108                      | 6.3 (5.3) | 6.6 (5.6–7.6) | 133                       | 4.5 (3.7)  | 4.6 (3.5–5.7) |
|                      | high intensity     | 214                           | 5.2 (2.8) | 5.2 (4.6–5.8) | 125                      | 5.9 (4.1) | 5.7 (4.8–6.6) | 140                       | 6.1 (8.1)  | 6.0 (4.9–7.1) |
| Dietary restrictions | no special diet    | 455                           | 5.4 (4.4) | 5.4 (5.0–5.8) | 332                      | 6.0 (4.5) | 6.2 (5.6–6.7) | 365                       | 5.3 (4.8)  | 5.3 (4.6–6.0) |
|                      | medical and/or     | 13                            | 6.1 (4.4) | 6.0 (3.7–6.9) | 32                       | 7.2 (5.8) | 7.0 (5.1–8.8) | 51                        | 5.9 (11.6) | 6.2 (4.4–8.0) |
|                      | weight loss        | (2.8)                         |           |               | (8.8)                    |           |               | (12.3)                    |            |               |
| Behavioural diet     | no diet            | 456                           | 5.5 (4.4) | n.a.          | 356                      | 6.2 (4.6) | n.a.          | 413                       | 5.4 (6.1)  | n.a.          |
|                      | veget./vegan       | 12                            | 4.4 (3.5) | n.a.          | 8                        | 4.8 (5.2) | n.a.          | 3                         | 2.5 (1.8)  | n.a.          |

**Note:** Body mass index (BMI) was considered as normal below 25 kg/m<sup>2</sup>, except for adolescents, where sex-/age-adjusted cut-off points [62,63] were used. Linear regression analysis conducted on samples with excluded missing values (Financial status:  $n = 57$  (adults) and 40 (elderly); International Physical Activity Questionnaire (IPAQ):  $n = 5$  (adolescents), 4 (adults), 6 (elderly)); difference in marginal linear predictions per different socio-demographic and other individual related characteristics within age categories:  $p < 0.01$  sex (adolescents);  $p = 0.01$  sex (adults).

**Supplementary Table S2.** The relative contributions of selected food categories to usual daily dietary vitamin B12 intakes among different age groups (% of total dietary vitamin B12 intake)

| Food category                     | Adolescents (10–17) | Adults (18–64) | Elderly (65–74) |
|-----------------------------------|---------------------|----------------|-----------------|
| <b>Bread and bakery products</b>  | <b>2.2</b>          | <b>2.7</b>     | <b>1.9</b>      |
| Bread                             | 0.7                 | 0.4            | 0.2             |
| Biscuits                          | 0.6                 | 0.4            | 0.4             |
| Cakes, muffins, and pastry        | 1.0                 | 2.0            | 1.4             |
| <b>Cereal and cereal products</b> | <b>18.7</b>         | <b>10.9</b>    | <b>0.0</b>      |
| <b>Convenience foods</b>          | <b>0.7</b>          | <b>0.4</b>     | <b>0.1</b>      |
| <b>Meat and meat products</b>     | <b>32.3</b>         | <b>44.5</b>    | <b>55.2</b>     |
| Processed meat                    | 8.6                 | 9.4            | 7.1             |

|                               |             |             |             |
|-------------------------------|-------------|-------------|-------------|
| Unprocessed meat              | 23.7        | 35.1        | 48.1        |
| <b>Fish and fish products</b> | <b>16.2</b> | <b>18.8</b> | <b>22.8</b> |
| Unprocessed fish              | 5.5         | 5.2         | 8.6         |
| Processed fish products       | 10.7        | 13.6        | 14.2        |
| <b>Milk and milk products</b> | <b>23.4</b> | <b>19.5</b> | <b>18.0</b> |
| Milk                          | 7.5         | 3.6         | 3.6         |
| Plain yogurt                  | 5.9         | 5.9         | 6.2         |
| Cheese                        | 9.9         | 9.9         | 7.9         |
| <b>Other</b>                  | <b>6.5</b>  | <b>3.4</b>  | <b>2.1</b>  |

**Supplementary Table S3.** Mean (SD) and model-adjusted mean (95% CI) serum homocysteine concentration ( $\mu\text{mol/L}$ ) by age, sex, residential area, education, financial status, smoking status, BMI, IPAQ, diet, use of multivitamin supplements, serum folate concentration ( $\text{nmol/L}$ ) and serum vitamin B12 concentration ( $\text{pmol/L}$ ).

| Variable                         | Level                      | N (%)      | Mean (SD)   | Adjusted mean (CI) |
|----------------------------------|----------------------------|------------|-------------|--------------------|
| Overall N (%)                    |                            | 271 (100)  | 13.8 (4.2)  |                    |
| Age                              | adults                     | 118 (43.5) | 12.7 (4.1)  | 12.7 (12.0–13.5)   |
|                                  | elderly                    | 153 (56.5) | 14.6 (4.0)  | 14.3 (13.7–14.9)   |
| Sex                              | male                       | 127 (46.9) | 15.2 (4.2)  | 15.1 (14.3–15.8)   |
|                                  | female                     | 144 (53.1) | 12.5 (3.7)  | 11.7 (11.7–13.1)   |
| Residential area                 | rural                      | 143 (52.8) | 14.2 (4.7)  | 13.9 (13.2–14.6)   |
|                                  | intermediate               | 41 (15.1)  | 13.5 (3.8)  | 13.5 (12.3–14.6)   |
|                                  | urban                      | 87 (32.1)  | 13.2 (3.3)  | 13.3 (12.5–14.1)   |
| Education                        | no university degree       | 193 (71.2) | 14.4 (4.3)  | 13.8 (13.2–14.4)   |
|                                  | university degree          | 78 (28.8)  | 13.1 (3.6)  | 13.2 (14.2–14.1)   |
| Financial status                 | below average              | 136 (53.5) | 14.0 (3.8)  | 13.7 (13.0–14.4)   |
|                                  | above average              | 118 (46.5) | 13.2 (4.4)  | 13.5 (12.8–14.3)   |
| Smoking status                   | current, ex-smoker         | 119 (43.9) | 13.4 (4.2)  | 13.8 (13.1–14.5)   |
|                                  | non smoker                 | 152 (56.1) | 14.2 (4.1)  | 13.5 (12.8–14.1)   |
| BMI                              | normal                     | 92 (34.0)  | 13.4 (5.0)  | 13.7 (12.9–14.6)   |
|                                  | overweight and obese       | 179 (66.0) | 14.0 (3.6)  | 13.6 (13.0–14.1)   |
| IPAQ                             | low intensity              | 87 (32.2)  | 13.5 (4.0)  | 13.5 (12.6–14.3)   |
|                                  | moderate                   | 88 (32.6)  | 14.1 (4.3)  | 14.1 (13.2–14.8)   |
|                                  | high intensity             | 95 (35.2)  | 13.7 (4.3)  | 13.3 (12.5–14.1)   |
| Special diet                     | no special diet            | 245 (90.4) | 13.7 (4.0)  | 13.6 (13.1–14.1)   |
|                                  | medical and/or weight loss | 26 (9.6)   | 14.2 (5.6)  | 14.2 (12.7–15.6)   |
| Behavioural diet                 | no diet                    | 267 (98.5) | 13.7 (3.9)  | 13.6 (13.1–14.0)   |
|                                  | vegetarian/vegan           | 4 (1.5)    | 17.9 (13.1) | 18.3 (14.4–22.1)   |
| Use of multi-vitamin supplements | not supplementing          | 169 (62.4) | 14.1 (4.4)  | 13.5 (12.8–14.1)   |
|                                  | supplementing              | 102 (37.6) | 13.2 (3.7)  | 13.9 (12.7–15.6)   |

Note: Body mass index (BMI) was considered as normal below  $25 \text{ kg/m}^2$ . Analysis conducted on samples with excluded missing values (financial status,  $n=17$ ; International Physical Activity Questionnaire (IPAQ),  $n=1$ ; education,  $n=1$ ; employment,  $n=1$ ). Significant association was detected for the following predictors: age ( $p<0.01$ ), sex ( $p<0.001$ ), behavioural diet ( $p<0.05$ ), serum folate ( $\beta = -0.06$ ,  $p<0.05$ ), serum vitamin B12 ( $\beta = -0.004$ ,  $p<0.05$ ). Difference in marginal linear predictors per different socio-demographic and other categorical predictors:  $p < 0.01$  age;  $p < 0.01$  sex;  $p<0.05$  behavioural diet.
